# Supplementary material
Source: PubMed Central journal article supplement (PMC4031195)
Supplement: NIHMS553117-supplement-supplement_1.pdf [file NIHMS553117-supplement-supplement_1.pdf]

**Supplementary Table 1. Causality assessment methods used in DILI studies**

| <b>% Likelihood of DILI</b> | <b>WHO 4 levels</b> | <b>Naranjo 4 levels</b> | <b>RUCAM 5 levels</b>   | <b>M &amp; V 5 Levels</b> | <b>DILIN 5 levels</b>              |
|-----------------------------|---------------------|-------------------------|-------------------------|---------------------------|------------------------------------|
| ➤ 75%                       | Level 1 (Certain)   | Definite                | Highly probable         | Definite                  | Definite (1) and Highly likely (2) |
| 50 to 75%                   | Level 2 (Probable)  | Probable                | Probable                | Probable                  | Probable                           |
| 25 to 50%                   | Level 3 (Possible)  | Possible                | Possible                | Possible                  | Possible                           |
| < 25%                       | Level 4 (Unlikely)  | Doubtful                | Not likely and excluded | Not likely and excluded   | Unlikely                           |

Adapted from LiverTox website at <http://www.livertox.nih.gov/>

Abbreviations: WHO, World Health Organization; RUCAM, Rousell-Uclaf Causality Assessment Method; M & V, Maria and Victorino; DILIN, Drug induced Liver Injury Network

**Supplementary Table 2. Genome wide association studies of DILI susceptibility**

| <b>Drug (Ref #)</b>                         | <b>DILI cases</b> | <b>Control</b>          | <b>Gene</b>             | <b>Minor allele frequency</b> | <b>Odds ratio</b> |
|---------------------------------------------|-------------------|-------------------------|-------------------------|-------------------------------|-------------------|
| Flucloxacillin (B-lactam antibiotic) (#125) | 51                | 282 population controls | HLA-B*5701              | 6%                            | 80                |
| Ximelagatran (Thrombin inhibitor) (#126)    | 74                | 130 treated controls    | DRB1*07<br>DQA1*02      | 8.5%                          | 4.4<br>4.4        |
| Lumiracoxib (COX-2 inhibitor) (#127)        | 41                | 176 treated controls    | DRB1*1501<br>DQB1*0602  | 15%                           | 5.0               |
| Lapatanib (Kinase inhibitor) (#128)         | 37                | 286 treated controls    | DQA1*02                 | 21%                           | 9.0               |
| Amoxicillin-clavulanate (Antibiotic) (#136) | 201               | 532 Population controls | DRB1*1501<br>HLA-A*0201 | 16%<br>4%                     | 2.8<br>2.3        |
